# Supplementary material for: Full-color emissive carbon-dots targeting cell walls of onion for in situ imaging of heavy metal pollution
Source: Royal Society of Chemistry journal article supplement (doi:10.1039/c9an00418a), 2019-01-01
Supplement: c9an00418a1.pdf [file c9an00418a1.pdf]

## Electronic Supplementary Information

### Carbon-dot targeting to lead(II)-adsorbed plant cell walls for in-situ multi-color fluorescence imaging

Zheng Yao, Zhiqiang Lai, Chengchi Chen, Suting Xiao, Peihui Yang\*

*Department of Chemistry, College of Chemistry and Materials Science, Jinan University, Guangzhou 510632, PR China*

*\* Corresponding author. Tel.: +86 02085223039; fax: +86 02085223039.*

*E-mail address: typh@jnu.edu.cn (P. H. Yang).*

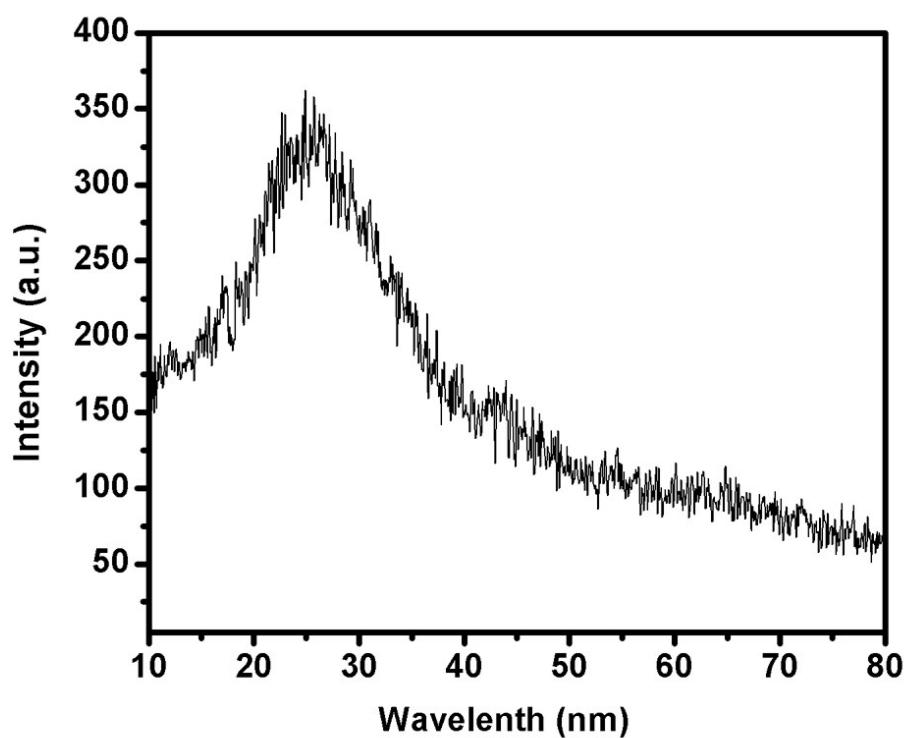

Fig. S1 The XRD spectrum of the F-CDs

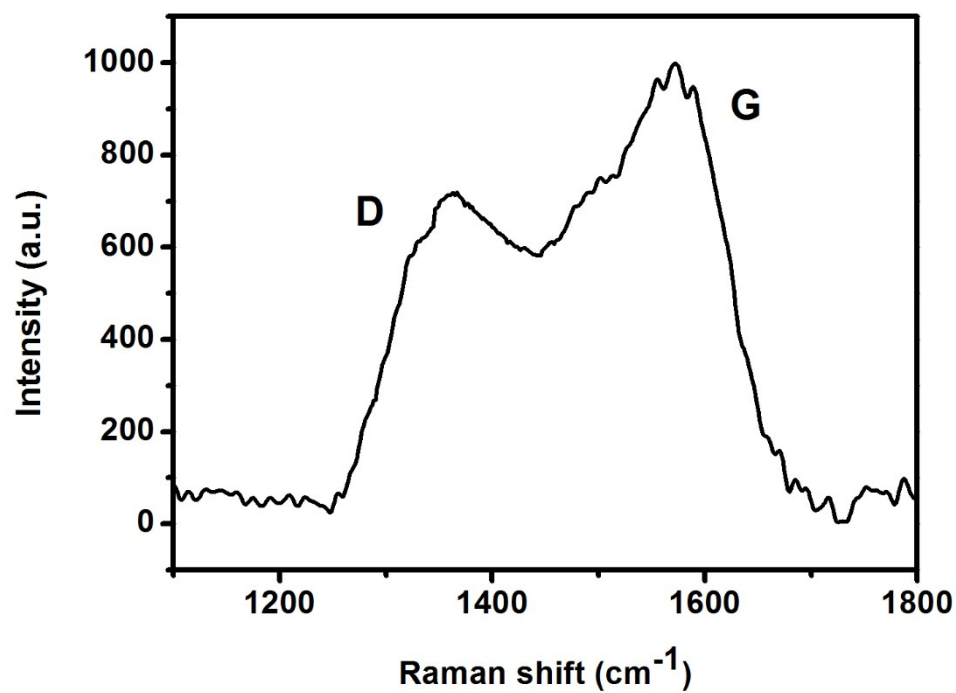

Fig. S2 Raman spectrum of the F-CDs

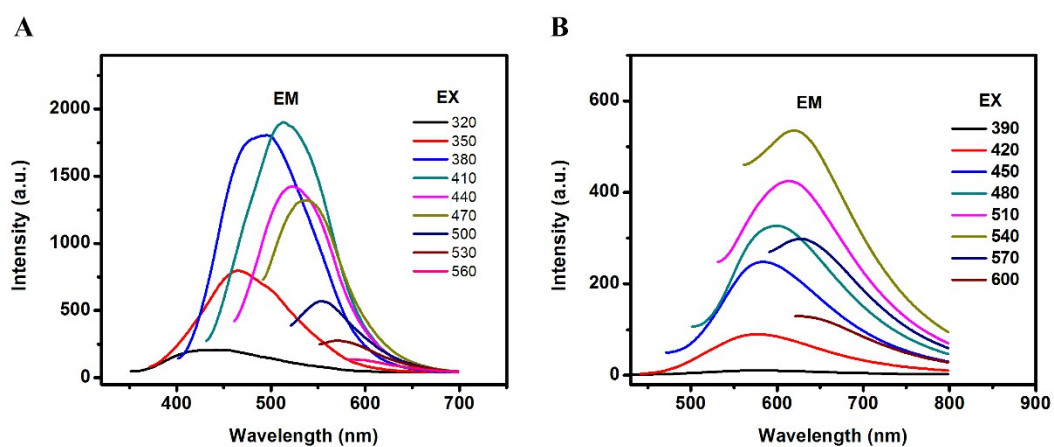

Fig. S3 Fluorescence spectrum of carbon dots prepared by (A) L-tryptophan and (B) luminol, respectively

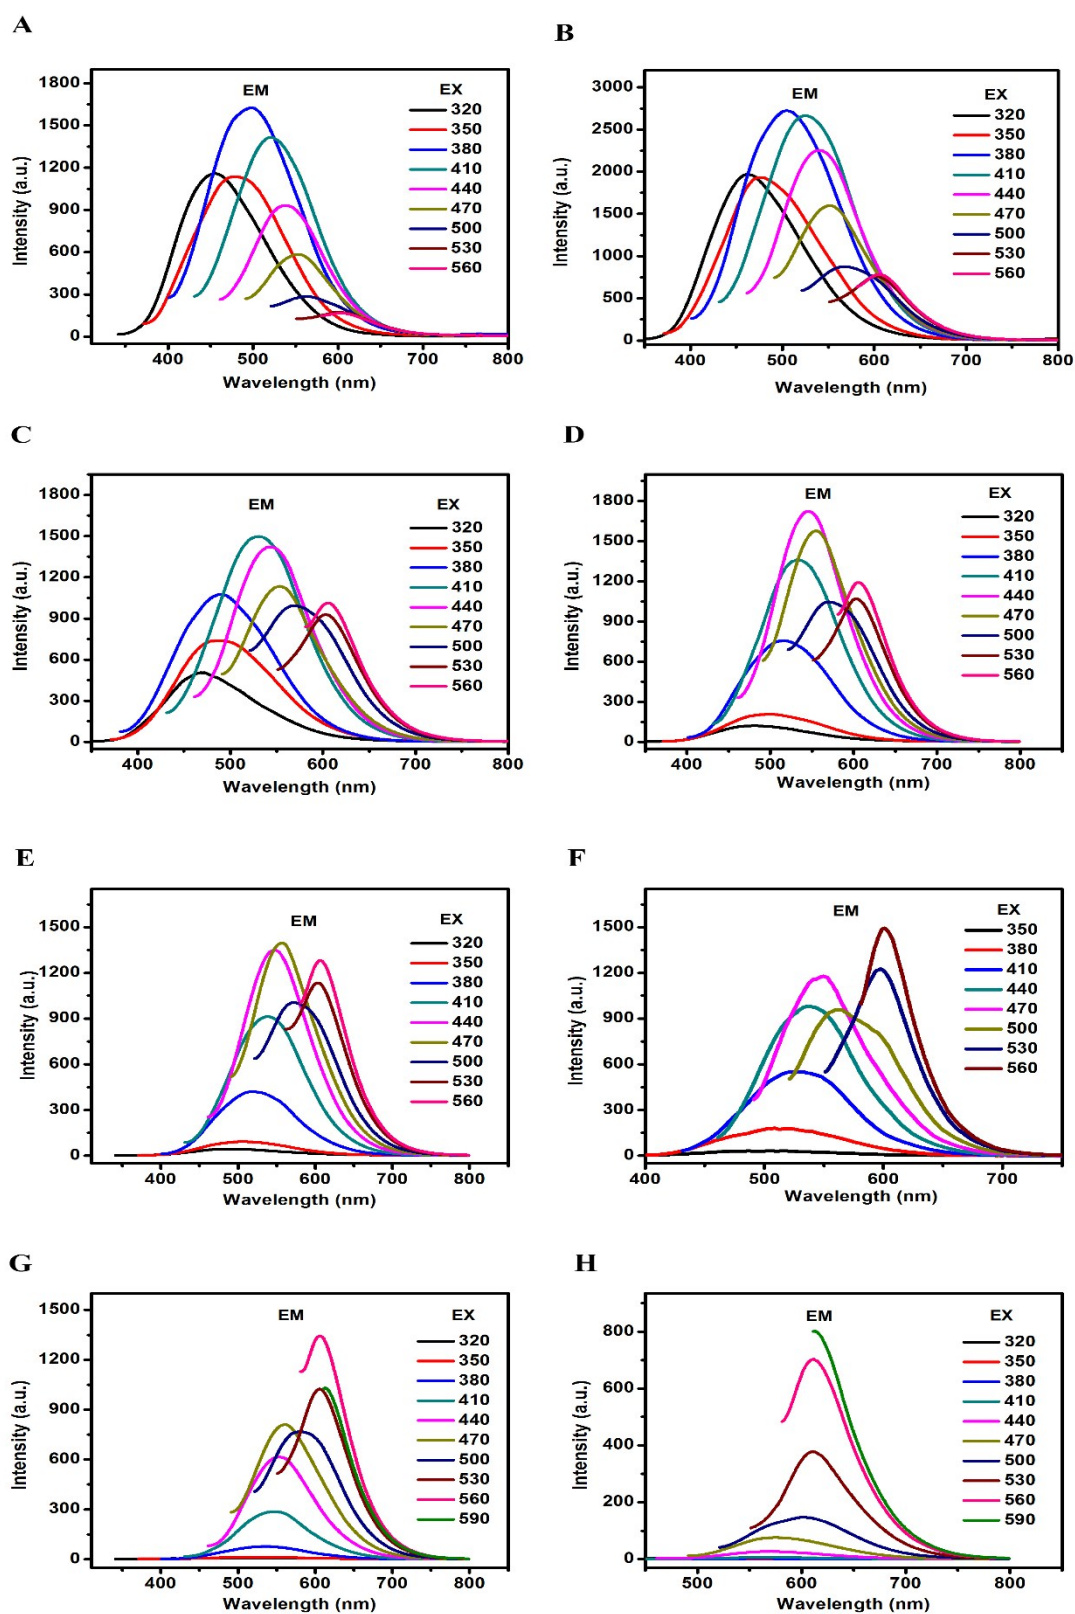

Fig. S4 Fluorescence spectra of F-CDs with different concentrations from (A) 0.020, (B) 0.10, (C) 0.15, (D) 0.20, (E) 0.25, (F) 0.30, (G) 0.40 to (H) 0.50 mg/mL under different excitation wavelengths

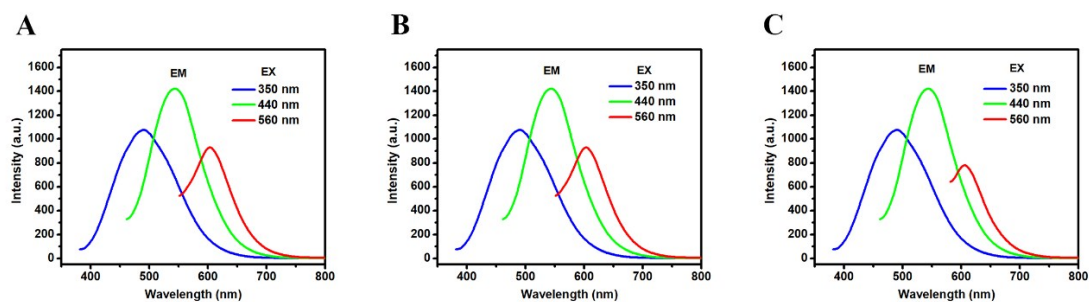

Fig. S5 Fluorescence intensity comparison between (A) 0.15mg/mL F-CDs (B) 0.15mg/mL L-cysteine modified F-CDs and (C) B treated with 0.1mM  $\text{Pb}^{2+}$  ions

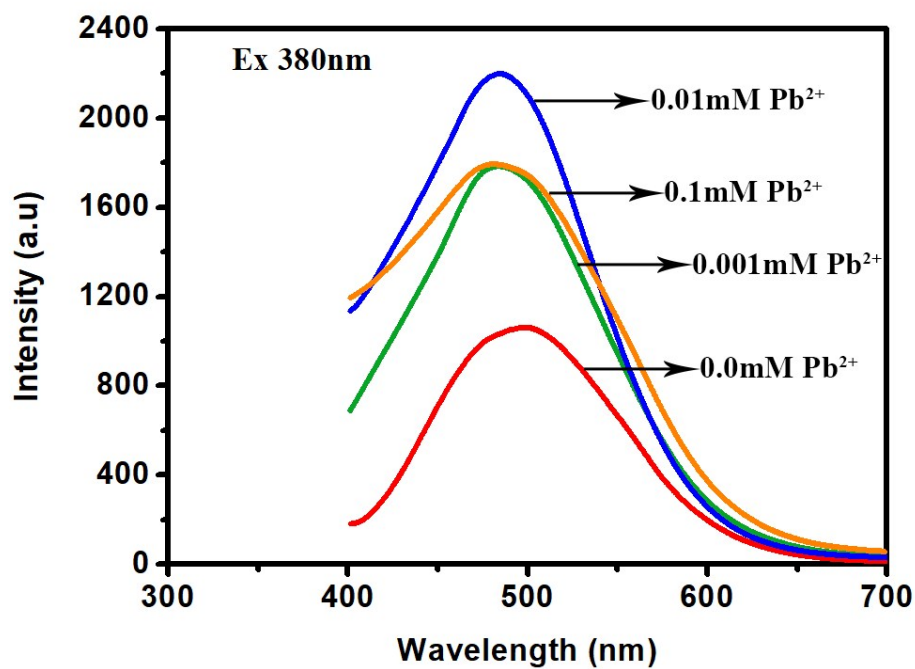

Fig. S6 Fluorescence spectra of thiolated F-CDs-treated cells under 0.0mM (red), 0.001mM (green), 0.01mM (blue) and 0.1mM (orange)  $\text{Pb}(\text{II})$ -ion treatment
